# Supplementary material
Source: publisher figshare collection journal article supplement (https://tandf.figshare.com/ndownloader/files/15327149)
Supplement: Supplementary file 1 [file 15327149]

**Supplementary information**

**Metabolic Profiling for Schizophrenia using Small Molecular Water-Soluble Metabolites: A Case-control Study**

1 Department of Laboratorial Science and Technology, School of Public Health, Peking University, Beijing 100191, P. R. China

2 Chongqing Blood center, Chongqing 400065, P. R. China

3 Mood Disorders Psychopharmacology Unit, Toronto Western Hospital, University Health Network, Toronto, ON, Canada.

4 Brain and Cognition Discovery Foundation, Toronto, ON, Canada

5 Department of Psychiatry, Federal University of São Paulo, São Paulo, SP, Brazil.

6 Beijing Key Laboratory of Toxicological Research and Risk Assessment for Food Safety, Beijing 100191, P.R. China

7 Peking University Medical and Health Analysis Center, Peking University, Beijing 100191, P.R. China

***Corresponding Author:**

Jing-Yu Wang, PhD, Department of Laboratorial Science and Technology, School of Public Health, Peking University, 38 Xue-Yuan Road, Haidian District, Beijing 100191, P.R. China. Tel/Fax: + 86-10-82801107, E-mail: [wjy@bjmu.edu.cn](mailto:wjy@bjmu.edu.cn)

**Table S1.** The gradient conditions for HILIC separation of small molecular water-soluble metabolites

| Time(min) | A(v%) | B(v%) |
| --- | --- | --- |
| 0 | 95 | 5 |
| 1 | 95 | 5 |
| 7 | 50 | 50 |
| 9 | 50 | 50 |
| 9.1 | 95 | 5 |
| 13 | 95 | 5 |

**Table S2 Demographic and Clinical Characteristics of First-episode and Recurrent Patients.**

| **Variables** | **First-episode**  **(*n*=29)** |  | **Recurrent**  **(*n*=84)** |  | ***p-value*** |
| --- | --- | --- | --- | --- | --- |
| **Age (year), mean (SD)** | 27.07 (7.27) |  | 30.27 (5.44) |  | 0.016 |
| **Gender M/F (n, %)** | 12/17 (41.4/58.6) |  | 31/53 (36.9/53.1) |  | 0.527 |
| **PANSS , mean (SD)** |  |  |  |  |  |
| Total score | 88.33 (22.37) |  | 87.53 (17.06) |  | 0.851 |
| Positive symptoms | 22.29 (9.03) |  | 21.49 (7.79) |  | 0.672 |
| Negative symptoms | 18.79 (7.72) |  | 20.47 (8.06) |  | 0.368 |
| General psychopathology | 44.17 (15.19) |  | 41.85 (11.87) |  | 0.434 |
| **Age of onset (years), mean (SD)** | 25.68 (7.21) |  | 22.46 (5.23) |  | 0.012 |
| **BMI (kg/m2), mean (SD)** | 22.35 (3.29) |  | 23.80 (3.60) |  | 0.070 |
| **FBG (mmol/L), mean (SD)** | 5.04 (0.57) |  | 5.33 (1.15) |  | 0.189 |
| **TG (mmol/L), mean (SD)** | 0.98 (0.46) |  | 1.24 (0.90) |  | 0.139 |
| **TC (mmol/L), mean (SD)** | 4.28 (1.01) |  | 4.60 (1.08) |  | 0.173 |

BMI, body mass index; FBG, fasting blood glucose; TG, triglyceride; TC, total cholesterol; PANSS, Positive and Negative Syndrome Scale.

**Table S3** Potential biomarkers of patients with schizophrenia versus controls in males and females

| **No.** | **Metabolites** | **m/z** | **RT(min)** | **Male** | |  | **Female** | |
| --- | --- | --- | --- | --- | --- | --- | --- | --- |
| **FC *a*** | ***q b*** |  | **FC *a*** | ***qb*** |
| 1 | Oleoylcarnitine | 426.3571 | 1.27 | 1.60 | <0.0001 |  | 1.43 | <0.0001 |
| 2 | L-Palmitoylcarnitine | 400.3414 | 1.29 | 1.30 | <0.0001 |  | 1.60 | <0.0001 |
| 3 | Taurine | 126.022 | 5.16 | 1.09 | 0.215 |  | 1.29 | <0.0001 |
| 4 | 9-Decenoylcarnitine | 314.2319 | 1.47 | 0.59 | <0.0001 |  | 0.60 | <0.0001 |
| 5 | 2-trans,4-cis-Decadienoylcarnitine | 312.2161 | 1.51 | 0.58 | <0.0001 |  | 0.62 | <0.0001 |
| 6 | LPC(P-16:0) | 480.3442 | 1.98 | 0.76 | <0.0001 |  | 0.66 | <0.0001 |
| 7 | LPC(16:0) | 496.3389 | 2.09 | 0.76 | <0.0001 |  | 0.78 | <0.0001 |
| 8 | LPC(15:0) | 482.3238 | 2.37 | 0.71 | <0.0001 |  | 0.69 | <0.0001 |
| 9 | LPC(14:0) | 468.3079 | 2.47 | 0.51 | <0.0001 |  | 0.69 | <0.0001 |
| 10 | 2,5-Dichloro-4-oxohex-2-enedioate | 226.951 | 5.04 | 0.96 | 0.020 |  | 0.93 | <0.0001 |
| 11 | L-Arginine | 175.1187 | 6.91 | 0.78 | <0.0001 |  | 0.83 | <0.0001 |

*a* Fold change (FC) was calculated as the ratio of the mean metabolite levels between two groups. FC>1.0 indicated a relatively higher concentration of metabolites while FC<1.0 indicated a relatively lower concentration in patients with schizophrenia as compared to healthy controls.

*b* *q*-values in the false discovery rate (FDR) control were defined as the FDR analog of the *p*-values which were calculated from two-tailed Mann-Whitney U-test with a threshold of 0.05.

**Table S4** Correlations between the levels of the metabolites and clinical variables in patients with schizophrenia.

|  | Oleoylcarnitine | L-Palmitoylcarnitine | 9-Decenoylcarnitine | 2-trans,4-cis-Decadienoylcarnitine | LysoPC(P-16:0) | LysoPC(16:0) | LysoPC(15:0) | LysoPC(14:0) | 2,5-Dichloro-4-oxohex-2-enedioate | Taurine | L-Arginine |
| --- | --- | --- | --- | --- | --- | --- | --- | --- | --- | --- | --- |
| Oleoylcarnitine | 1 | 0.922** | 0.376** | 0.231* | -0.027 | -0.232* | -0.601** | -0.671** | -0.02 | 0.168 | -0.390** |
| L-Palmitoylcarnitine | 0.922** | 1 | 0.419** | 0.295** | 0.035 | -0.072 | -0.478** | -0.529** | -0.105 | 0.169 | -0.386** |
| 9-Decenoylcarnitine | 0.376** | 0.419** | 1 | .897** | -0.029 | -0.033 | -0.178 | -0.133 | -0.169 | 0.021 | -0.125 |
| 2-trans,4-cis-Decadienoylcarnitine | 0.231* | 0.295** | 0.897** | 1 | -0.117 | -0.031 | -0.115 | -0.011 | -0.167 | 0.036 | -0.062 |
| LysoPC(P-16:0) | -0.027 | 0.035 | -0.029 | -0.117 | 1 | 0.544** | 0.487** | 0.193* | -0.015 | 0.187* | -0.135 |
| LysoPC(16:0) | -0.232* | -0.072 | -0.033 | -0.031 | 0.544** | 1 | 0.727** | 0.602** | -0.031 | 0.205* | 0.083 |
| LysoPC(15:0) | -0.601** | -0.478** | -0.178 | -0.115 | 0.487** | 0.727** | 1 | 0.845** | -0.053 | 0.084 | 0.205* |
| LysoPC(14:0) | -0.671** | -0.529** | -0.133 | -0.011 | 0.193* | 0.602** | 0.845** | 1 | -0.123 | 0.05 | 0.234* |
| 2,5-Dichloro-4-oxohex-2-enedioate | -0.02 | -0.105 | -0.169 | -0.167 | -0.015 | -0.031 | -0.053 | -0.123 | 1 | 0.477** | 0.344** |
| Taurine | 0.168 | 0.169 | 0.021 | 0.036 | 0.187* | 0.205* | 0.084 | 0.05 | 0.477** | 1 | 0.109 |
| L-Arginine | -0.390** | -0.386** | -0.125 | -0.062 | -0.135 | 0.083 | 0.205* | .234* | 0.344** | 0.109 | 1 |
| Age | -0.091 | -0.123 | -0.046 | -0.025 | -0.162 | 0.067 | 0.076 | 0.085 | 0.103 | -0.147 | 0.179 |
| BMI | -0.059 | -0.014 | 0.092 | 0.202* | -0.217* | 0.190* | 0.011 | .201* | 0.05 | 0.098 | 0.185 |
| Age of onset | -0.016 | -0.026 | -0.069 | -0.06 | -0.06 | -0.01 | -0.037 | -0.077 | 0 | -0.175 | 0.031 |
| Duration of illness | 0.108 | 0.128 | -0.034 | -0.082 | 0.025 | 0.129 | 0.03 | 0.076 | 0.08 | 0.168 | 0.054 |
| FBG | 0.059 | 0.128 | 0.183 | 0.162 | -0.075 | 0.043 | -0.049 | 0.078 | -0.01 | -0.033 | 0.129 |
| TG | -0.266** | -0.187* | -0.096 | -0.017 | -0.081 | 0.440** | 0.398** | 0.465** | -0.086 | -0.063 | 0.304** |
| TC | 0.155 | 0.262** | 0.146 | 0.123 | 0.118 | 0.302** | 0.13 | 0.155 | -0.313** | 0.017 | -0.126 |
| PANSS Positive symptoms | 0.087 | 0.073 | 0.034 | 0.086 | -0.073 | -0.115 | -0.047 | -0.018 | -0.237* | -0.201* | -0.129 |
| PANSS Negative symptoms | -0.076 | -0.077 | -0.065 | -0.09 | -0.158 | -0.036 | -0.04 | -0.075 | 0.043 | -0.05 | 0.081 |
| PANSS General psychopathology | -0.018 | 0.015 | 0.029 | 0.05 | -0.095 | 0.057 | 0.041 | 0.038 | -0.264** | -0.122 | -0.011 |
| PANSS Total score | -0.002 | -0.029 | -0.017 | 0.011 | -0.075 | 0.06 | 0.038 | -0.002 | -0.086 | -0.089 | 0.088 |

Red and blue represent positive and negative correlations, respectively. * *p* < 0.05, ** *p* < 0.01. BMI, Body Mass Index; FBG, Fasting Blood Glucose; TG, Triglyceride; TC, Total Cholesterol.

**
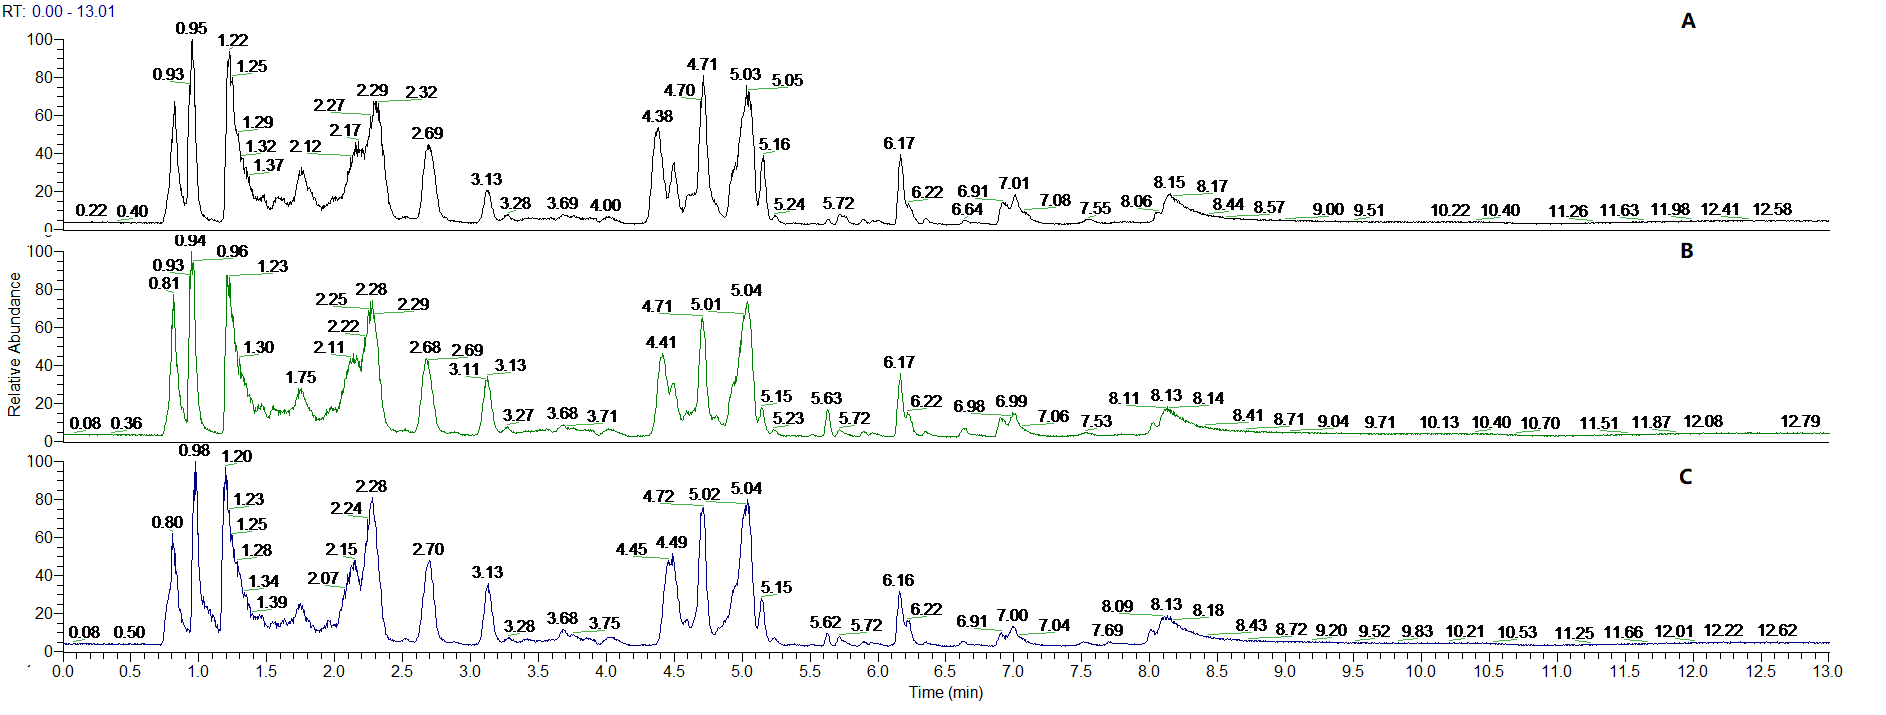
**

**Figure S1.** The typical total current chromatograms of serum samples from (A) the patient group, (B) the control group and (C) the QC group

**
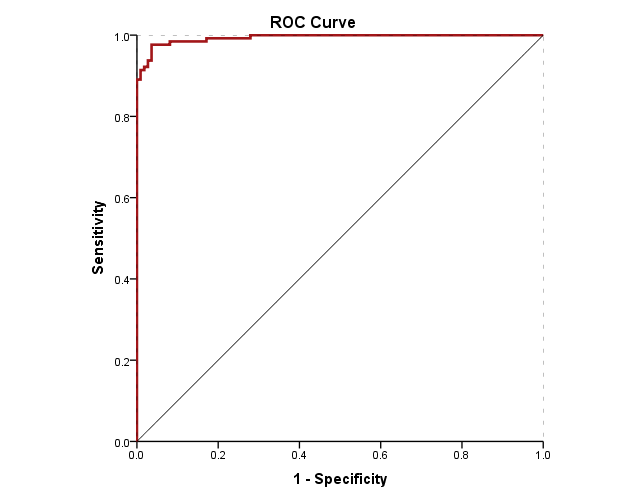
**

**Figure S2.** ROC curves illustrate the classification performance of biomarker panels for distinguishing between patients with schizophrenia and healthy controls, AUC=0.993 (95%CI: 0.987-1.000).
